# Supplementary material
Source: Springer Nature journal article supplement (https://www.springermedizin.de/resource/supplementary/12958_2010_749_MOESM1_ESM.pdf/9568394)

600  
500  
400  
300  
200  
100

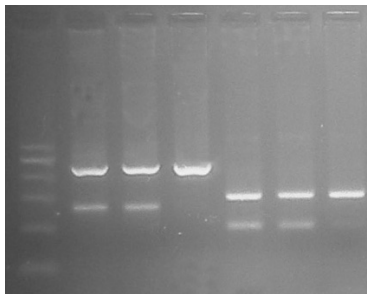

600  
500  
400  
300  
200  
100

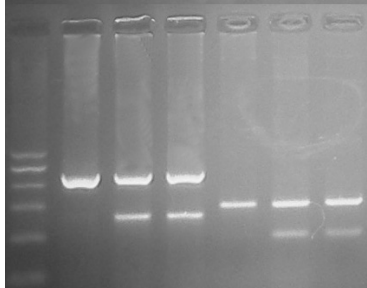

M 1 2 3 4 5 6

Supplement: MOESM1 [file 9568394]
